# Supplementary material for: Naringenin improves the sunscreen performance of vegetable nanocarriers
Source: Royal Society of Chemistry journal article supplement (doi:10.1039/c6nj02318e), 2016-11-22
Supplement: c6nj02318e1.pdf [file c6nj02318e1.pdf]

*New Journal of Chemistry*

**Naringenin improves the sunscreen performance of vegetable nanocarriers**

Gabriela Badea, Nicoleta Badea, Lorelei I. Brasoveanu, Mirela Mihaila, Raluca Stan, Daniela Istrati, Teodora Balaci, Ioana Lacatusu\*

Supplementary material

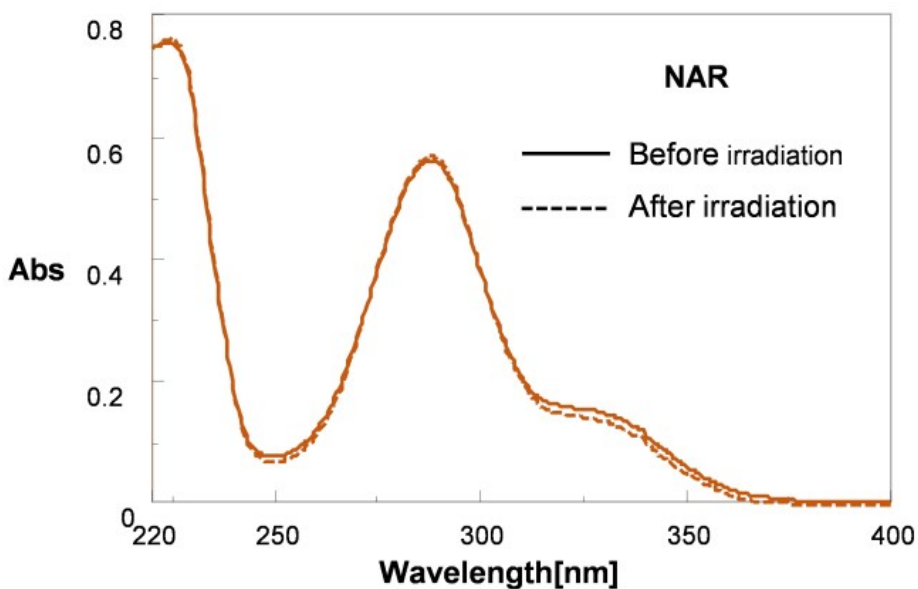

Figure. UV absorption spectra of Naringenin before and after UVA and UVB exposure.

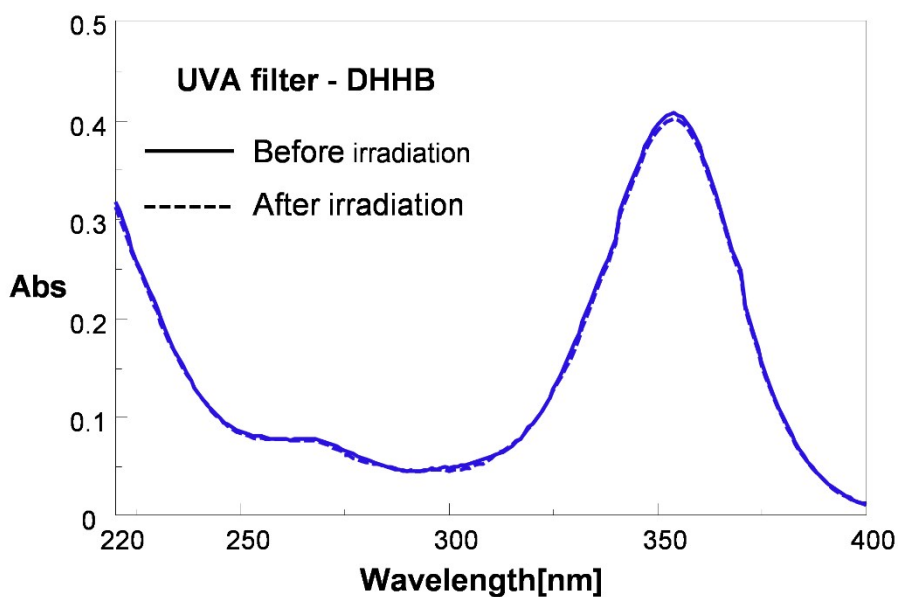

Figure. UV absorption spectra of the UVA filter diethylamino hydroxybenzoyl hexyl benzoate (DHHB) before and after UVA and UVB exposure.
